# Supplementary material for: Strengthening surveillance systems for malaria elimination: a global landscaping of system performance, 2015–2017
Source: Springer Nature journal article supplement (doi:10.1186/s12936-019-2960-2), 2019-09-18
Supplement: MOESM1 [file 17185400]

Additional File 1.

**Summary table of the surveillance landscaping based on the optimal framework.**

Each country in the landscaping was reviewed against the surveillance components outlined in each main stage; data collection, reporting, analysis, response, and operations. Each country component was qualitatively measured and marked as “lacking or weak”, “planned but not yet implemented or acceptable”, or “in place or strong”. Country names were removed for confidentiality.

| Loop Stage      | Component                               | Countries |        |        |        |        |        |        |        |        |        |        |        |        |        |        |
|-----------------|-----------------------------------------|-----------|--------|--------|--------|--------|--------|--------|--------|--------|--------|--------|--------|--------|--------|--------|
| Data Collection | Case-based surveillance system          | Yellow    | Red    | Red    | Yellow | Yellow | Green  | Green  | Yellow | Green  | Green  | Yellow | Green  | Yellow | Yellow | Red    |
|                 | Community-based and active surveillance | Red       | Red    | Red    | Yellow | Red    | Green  | Yellow | Yellow | Yellow | Green  | Yellow | Green  | Red    | Yellow | Yellow |
|                 | Private Sector Inclusion                | Yellow    | Yellow | Red    | Green  | Yellow | Green  | Green  | Yellow | Yellow | Yellow | Red    | Red    | Yellow | Red    | Red    |
|                 | Case Confirmation (tested)              | Green     | Green  | Yellow | Green  | Yellow | Green  | Green  | Yellow | Yellow | Yellow | Green  | Green  | Green  | Red    | Green  |
|                 | Case Classification                     | Red       | Red    | Yellow | Red    | Yellow | Green  | Green  | Yellow | Yellow | Green  | Yellow | Yellow | Green  | Yellow | Red    |
|                 | Geolocation                             | Red       | Red    | Red    | Yellow | Red    | Green  | Yellow | Yellow | Green  | Green  | Green  | Red    | Green  | Red    | Green  |
|                 | Vector and Intervention data            | Green     | Yellow | Red    | Yellow | Yellow | Yellow | Yellow | Yellow | Yellow | Yellow | Yellow | Yellow | Yellow | Yellow | Yellow |
| Reporting       | Integrated Systems (data linked)        | Red       | Red    | Yellow | Red    | Red    | Yellow | Yellow | Red    | Red    | Yellow | Yellow | Red    | Green  | Red    | Yellow |
|                 | Data accessibility                      | Yellow    | Red    | Red    | Yellow | Yellow | Yellow | Yellow | Yellow | Yellow | Yellow | Red    | Yellow | Yellow | Red    | Red    |
|                 | Electronic entry and reporting          | Yellow    | Red    | Red    | Yellow | Yellow | Yellow | Yellow | Red    | Green  | Red    | Green  | Yellow | Yellow | Yellow | Red    |
|                 | Timeliness                              | Red       | Red    | Red    | Red    | Red    | Green  | Green  | Red    | Red    | Red    | Yellow | Yellow | Green  | Yellow | Yellow |
|                 | Data Validation                         | Green     | Red    | Yellow | Red    | Yellow | Yellow | Yellow | Yellow | Yellow | Yellow | Yellow | Red    | Yellow | Red    | Red    |
| Analysis        | Descriptive Outputs (maps, graph...)    | Green     | Green  | Yellow | Green  | Green  | Green  | Green  | Green  | Green  | Yellow | Yellow | Green  | Yellow | Yellow | Red    |
|                 | Operational stratification              | Yellow    | Yellow | Red    | Red    | Yellow | Yellow | Red    | Yellow | Yellow | Yellow | Yellow | Yellow | Green  | Yellow | Yellow |
| Response        | Intervention/ACD targeting              | Yellow    | Red    | Red    | Yellow | Yellow | Green  | Green  | Yellow | Yellow | Yellow | Green  | Yellow | Yellow | Yellow | Red    |
|                 | Strategic and operational planning      | Yellow    | Red    | Red    | Yellow | Yellow | Yellow | Green  | Yellow | Yellow | Yellow | Yellow | Green  | Green  | Yellow | Yellow |
| Operations      | HR capacity                             | Green     | Red    | Red    | Yellow | Yellow | Yellow | Green  | Yellow | Yellow | Yellow | Yellow | Yellow | Yellow | Yellow | Yellow |
|                 | Guidelines, Strategy, SOP               | Green     | Yellow | Red    | Yellow | Yellow | Yellow | Yellow | Yellow | Yellow | Yellow | Yellow | Yellow | Green  | Green  | Yellow |

  

|                                                                                                                          |                                                          |
|--------------------------------------------------------------------------------------------------------------------------|----------------------------------------------------------|
| <span style="display:inline-block; width:15px; height:15px; background-color: #800000; border: 1px solid black;"></span> | Component lacking or weak                                |
| <span style="display:inline-block; width:15px; height:15px; background-color: #FFD700; border: 1px solid black;"></span> | Component planned but not yet implemented, or acceptable |
| <span style="display:inline-block; width:15px; height:15px; background-color: #6AA84F; border: 1px solid black;"></span> | Component in place, or strong                            |
| <span style="display:inline-block; width:15px; height:15px; background-color: #A9A9A9; border: 1px solid black;"></span> | Unknown                                                  |
