# Supplementary material for: Strengthening surveillance systems for malaria elimination: a global landscaping of system performance, 2015–2017
Source: Springer Nature journal article supplement (doi:10.1186/s12936-019-2960-2), 2019-09-18
Supplement: MOESM2 [file 17185400]

**Additional File 2. Sources for Quantitative Cascades**

|                           | <b>Seeking Care</b>                                                                                                                                                                         | <b>Diagnosis</b>                                                                                                                                                                     | <b>Facility Participation</b>                                                           | <b>Reporting</b>                                                                     |
|---------------------------|---------------------------------------------------------------------------------------------------------------------------------------------------------------------------------------------|--------------------------------------------------------------------------------------------------------------------------------------------------------------------------------------|-----------------------------------------------------------------------------------------|--------------------------------------------------------------------------------------|
| <b>Vietnam</b>            | <a href="#">University of California, San Francisco. The Private Sector's Role in Malaria Surveillance. December 2014.</a>                                                                  | National Institute of Malariology, Parasitology and Entomology (NIMPE) malaria database, and Annual Program Review, 2015                                                             | NIMPE paper-based reporting system data                                                 | NIMPE Annual Program Review, 2015                                                    |
| <b>Cambodia</b>           | Cambodia Malaria Survey, 2013                                                                                                                                                               | <a href="#">ACTWatch Outlet Survey, 2013</a>                                                                                                                                         | Malaria Information System (MIS), data by health center level, 2014                     | Health Information System (HIS), data by operational district (OD), 2014             |
| <b>Laos</b>               | <a href="#">Nonaka D, Vongseththa K, Kobayashi J, Bounyadeth S, Kano S, Phompida S, Jimba M: Public and private sector treatment of malaria in Lao PDR. Acta Tropica 2009, 112:283–287.</a> | Centre for Malaria Parasitology and Entomology (CMPE), The Global Fund to Fight AIDS, Tuberculosis and Malaria (GFATM) Revised Progress Update and Disbursement Request (PUDR), 2014 | MIS, data by district, 2014                                                             | MIS, 2015                                                                            |
| <b>Myanmar</b>            | <a href="#">ACTWatch, 2014</a>                                                                                                                                                              | <a href="#">ACTWatch, 2014</a>                                                                                                                                                       | Malaria Consortium (MC) Surveillance Assessment, 2013                                   | Malaria Consortium (MC) Surveillance Assessment, 2013                                |
| <b>Botswana</b>           | National Malaria Control Program (NMCP) consultation, 2015 (unpublished data)                                                                                                               | HIS data, 2014                                                                                                                                                                       | Integrated Disease Surveillance and Response (IDSR) Unit data, 2014                     | HIS data, 2014                                                                       |
| <b>Mozambique</b>         | <a href="#">Demographic and Health Survey (DHS), 2011</a>                                                                                                                                   | Centro de Investigação em Saúde de Manhiça (CISM) RDT study in 4 provinces, 2013                                                                                                     | Boletim Epidemiológico Semanal (bulletin for notifiable diseases, BES), 2014            | Annual summary file from BES with cases and intervention data from 2011 through 2014 |
| <b>Namibia</b>            | <a href="#">DHS, 2013</a>                                                                                                                                                                   | Weekly Surveillance System (WSS), 2014                                                                                                                                               | <a href="#">DHS, 2013</a>                                                               | NMCP consultation, 2015 (unpublished data)                                           |
| <b>South Africa</b>       | <a href="#">DHS, 2003</a>                                                                                                                                                                   | <a href="#">Frean et al. 2013, SAMJ - Case management of malaria: Diagnosis</a>                                                                                                      | <a href="#">DHS, 2003</a>                                                               | <a href="#">World Malaria Report, 2015</a>                                           |
| <b>Eswatini</b>           | Malaria Indicator Survey, 2010                                                                                                                                                              | NMCP seasonal data, 2014-2015                                                                                                                                                        | NMCP seasonal data, 2014-2015                                                           | NMCP seasonal data, 2014-2015                                                        |
| <b>Zimbabwe</b>           | MIS, 2012                                                                                                                                                                                   | PMI Malaria Operational Plan, 2015 (using DHIS2 data)                                                                                                                                | NMCP presentation at Elimination 8 meeting, July 2015                                   | <a href="#">World Malaria Report, 2014</a>                                           |
| <b>Haiti</b>              | <a href="#">Haiti Mortality, Morbidity and Service Utilization Survey, 2012</a>                                                                                                             | Evaluation of Malaria and Antimalarial Services in Haiti's Health Facilities, 2014-2015                                                                                              | Evaluation of Malaria and Antimalarial Services in Haiti's Health Facilities, 2014-2015 | (Haïti Système d'Information Sanitaire) HSIS data, 2014                              |
| <b>Dominican Republic</b> | <a href="#">DHS, 2013</a>                                                                                                                                                                   | NMCP consultation, 2015 (unpublished data)                                                                                                                                           | NMCP consultation, 2015 (unpublished data)                                              | Ministry of Health (MoH) case data, 2008-2015                                        |
| <b>Guatemala</b>          | <a href="#">DHS, 2014-2015</a>                                                                                                                                                              | NMCP consultation, 2015 (unpublished data)                                                                                                                                           | NMCP consultation, 2015 (unpublished data)                                              | NMCP consultation, 2015 (unpublished data)                                           |
| <b>Honduras</b>           | <a href="#">DHS, 2011-2012</a>                                                                                                                                                              | Knowledge, Attitude and Practices (KAP) Survey, 2011                                                                                                                                 | Knowledge, Attitude and Practices (KAP) Survey, 2011                                    | NMCP consultation, 2015 (unpublished data)                                           |
| <b>Costa Rica</b>         | <a href="#">MinSa publicación 2005 - "La inmigración en Costa Rica: Dinamicas, Desarrollo, y Desafíos"</a>                                                                                  | Ministerio de Salud (MinSa) consultation, 2015                                                                                                                                       | Ministerio de Salud (MinSa) consultation, 2015                                          | Ministerio de Salud (MinSa) consultation, 2015                                       |
| <b>Panama</b>             | Ministry of Health, Epi Info Case Reports, 2014                                                                                                                                             | Clinton Health Access Initiative (CHAI) Health Facility Survey, 2015                                                                                                                 | Clinton Health Access Initiative (CHAI) Health Facility Survey, 2015                    | Clinton Health Access Initiative (CHAI) Health Facility Survey, 2015                 |
